# Supplementary material
Source: PubMed Central journal article supplement (PMC3837443)
Supplement: Supp_Fig1.pdf [file Supp_Fig1.pdf]

## Supplementary Data

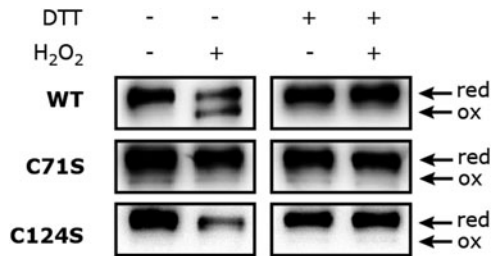

**SUPPLEMENTARY FIG. S1. H<sub>2</sub>O<sub>2</sub> treatment leads to formation of a disulfide bond in PTEN-WT, but not in PTEN-C71S or PTEN-C124S.** Recombinant PTEN-WT, -C71S, or -C124S was prereduced with 20 mM DTT for 10 min, followed by buffer exchange into a nonreducing PTEN assay buffer. Proteins were exposed to a buffer or 100  $\mu$ M H<sub>2</sub>O<sub>2</sub> for 5 min, following which, the reaction was stopped by addition of an excess of NEM to block free thiols either immediately (*left panel*) or following addition of 10 mM DTT (*right panel*). Samples were subjected to nonreducing SDS-PAGE and immunoblotting with an anti-PTEN antibody. DTT, dithiothreitol; H<sub>2</sub>O<sub>2</sub>, hydrogen peroxide; NEM, N-ethyl maleimide; PTEN, phosphatase and tensin homolog; WT, wild type.
