# Supplementary material
Source: PubMed Central journal article supplement (PMC3837443)
Supplement: Supp_Fig2.pdf [file Supp_Fig2.pdf]

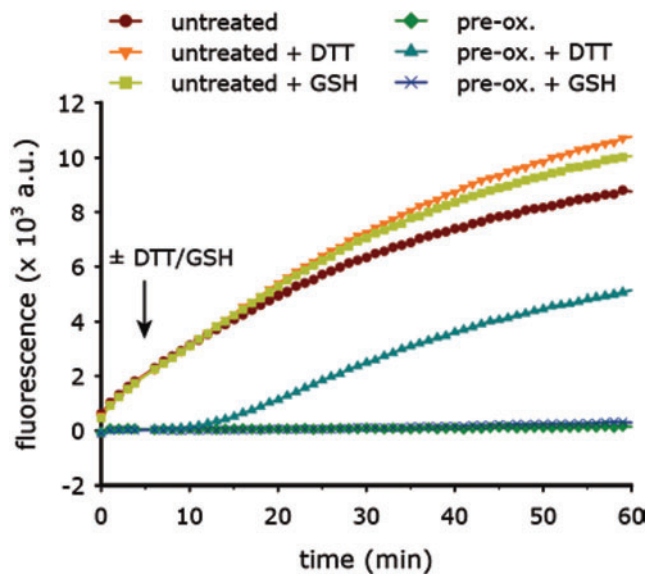

**SUPPLEMENTARY FIG. S2. Five mM GSH does not measurably reduce preoxidized PTEN-WT.** Reduced PTEN-WT ( $3.6 \mu\text{M}$ ) pretreated either with buffer (untreated) or  $1 \text{ mM H}_2\text{O}_2$  for 15 min, was desalted, and subjected to the PTEN activity assay under nonreducing conditions (at a final protein concentration of  $380 \text{ nM}$ ). At the point indicated,  $5 \text{ mM DTT}$ ,  $5 \text{ mM GSH}$ , or buffer was injected to demonstrate reactivation of PTEN by DTT, but not GSH, during the course of the assay. Curves represent means of triplicate wells. GSH, (reduced) glutathione.
