# Supplementary material
Source: PubMed Central journal article supplement (PMC3837443)
Supplement: Supp_Fig3.pdf [file Supp_Fig3.pdf]

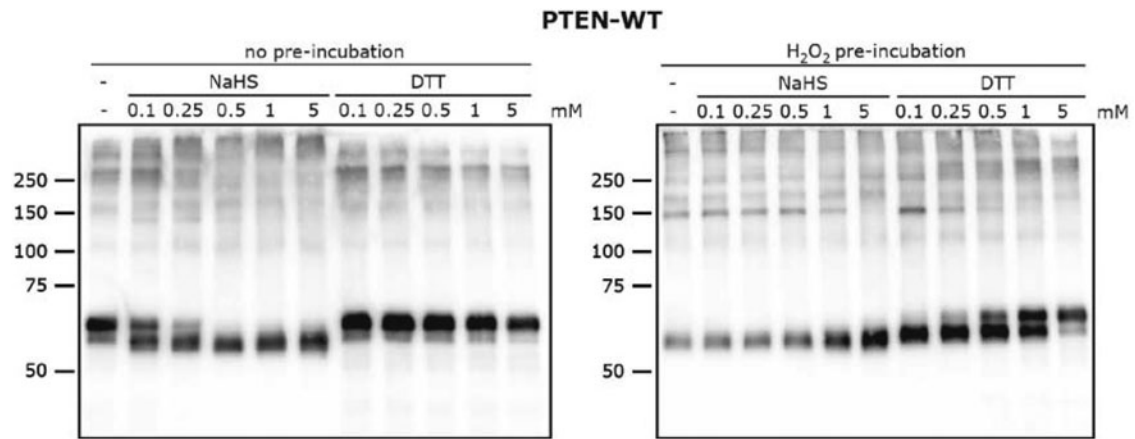

**SUPPLEMENTARY FIG. S3. NaHS solution does not show a reductive effect on preoxidized PTEN-WT.** Recombinant PTEN-WT was prereduced with 20 mM DTT for 10 min, followed by buffer exchange into nonreducing PTEN assay buffer. PTEN (4.2  $\mu$ M) was exposed to buffer or 1.11 mM H<sub>2</sub>O<sub>2</sub> for 15 min, and again subjected to buffer exchange to remove H<sub>2</sub>O<sub>2</sub>. Protein samples (380 nM) were then either left untreated or treated with 0.1–5 mM NaHS (Cayman) or DTT for 20 min, following which, the reaction was stopped by addition of an excess of NEM to block free thiols. Samples were subjected to nonreducing SDS-PAGE and immunoblotting with an anti-PTEN antibody. NaHS, sodium hydrosulfide.
