# Supplementary material
Source: PubMed Central journal article supplement (PMC3837443)
Supplement: Supp_Fig4.pdf [file Supp_Fig4.pdf]

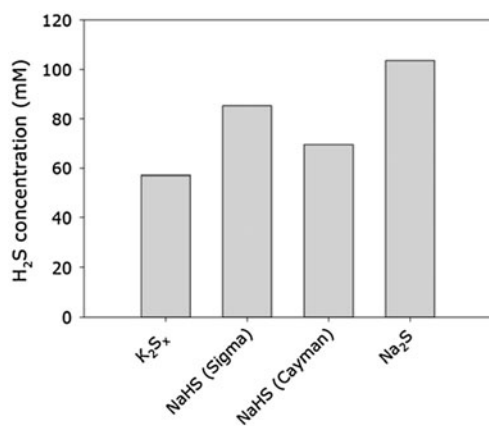

**SUPPLEMENTARY FIG. S4. H<sub>2</sub>S concentration of K<sub>2</sub>S<sub>x</sub>, NaHS and Na<sub>2</sub>S stock solutions used in Figure 4A, C.** The absorbance at 230 nm of K<sub>2</sub>S<sub>x</sub> (13.2 mg/ml), NaHS ([Sigma or Cayman], 120 mM) or Na<sub>2</sub>S (120 mM) stock solutions prepared for Figure 4A and C was recorded to determine H<sub>2</sub>S levels as described in Materials and Methods. Note that a relatively rapid loss of gaseous H<sub>2</sub>S was observed when H<sub>2</sub>S donors were dissolved in buffers of physiological pH. H<sub>2</sub>S, hydrogen sulfide; K<sub>2</sub>S<sub>x</sub>, potassium (poly)sulfide; Na<sub>2</sub>S, sodium sulfide.
