# Supplementary material
Source: PubMed Central journal article supplement (PMC3837443)
Supplement: Supp_Fig7.pdf [file Supp_Fig7.pdf]

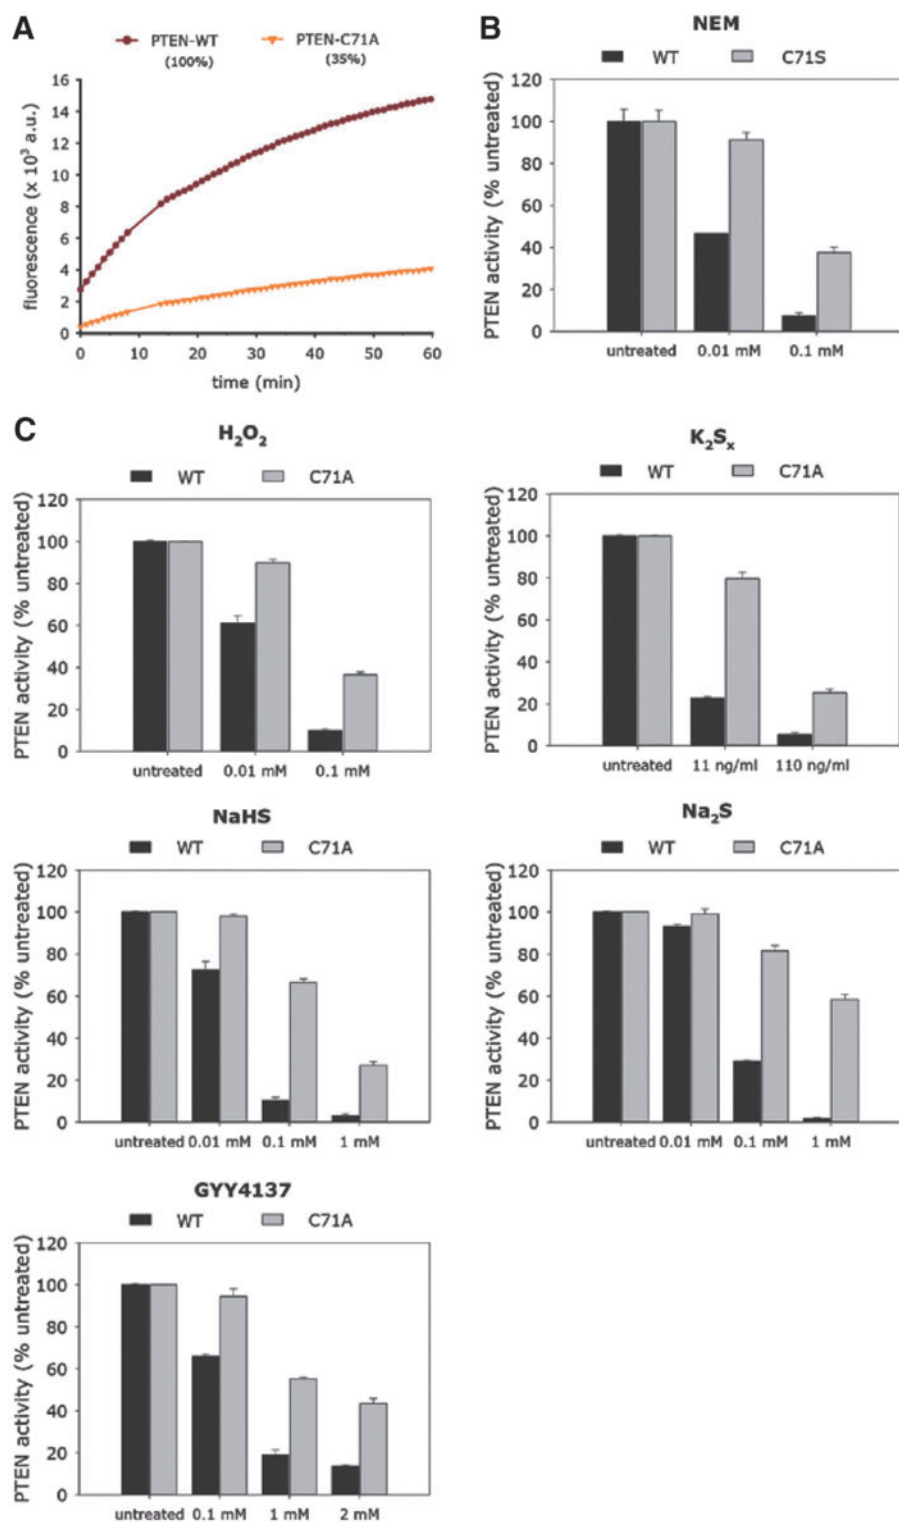

**SUPPLEMENTARY FIG. S7. PTEN-C71A/S is less reactive than PTEN-WT.** (A) Activity of untreated PTEN-C71A (380 nM) was measured under nonreducing conditions, and was found to be only ~35% of WT activity (380 nM). Curves represent means of duplicate wells. Identical data were obtained with PTEN-C71S (not shown). (B, C) Lower reactivity of both C71S (B) and C71A (C) was confirmed by lower sensitivity to alkylating agents and oxidants, including H<sub>2</sub>O<sub>2</sub> and polysulfides. The PTEN activity 50 min after addition of stimuli was quantified as described for Figure 2B. Bars denote means  $\pm$  range of duplicate wells.
