# Supplementary material
Source: PubMed Central journal article supplement (PMC3837443)
Supplement: Supp_Fig9.pdf [file Supp_Fig9.pdf]

| Sample                         | WT untreated     | WT + NaHS        | WT + H2O2        | C71S + NaHS      |
|--------------------------------|------------------|------------------|------------------|------------------|
| Sequence                       | (D)DNHVAAIHcK(A) | (D)DNHVAAIHcK(A) | (D)DNHVAAIHcK(A) | (D)DNHVAAIHcK(A) |
| Prob                           | 95%              | 95%              | 95%              | 95%              |
| SEQUEST XCorr                  | 3,2965           | 3,4398           | 3,5264           | 3,4063           |
| SEQUEST $\Delta$ Cn            | 0,6091           | 0,5861           | 0,6456           | 0,6111           |
| Modifications                  | IAM (+57)        | IAM (+57)        | IAM (+57)        | IAM (+57)        |
| Observed precurs or ion mass   | 582,7825         | 582,7824         | 582,7826         | 582,7827         |
| Neutral molecular peptide mass | 1163,5505        | 1163,5503        | 1163,5506        | 1163,5508        |
| Charge                         | 2                | 2                | 2                | 2                |
| $\Delta$ AMU                   | -0,000124        | -0,000368        | -0,000001        | 0,000121         |
| $\Delta$ PPM                   | -0,106700        | -0,316300        | -0,001118        | 0,103600         |

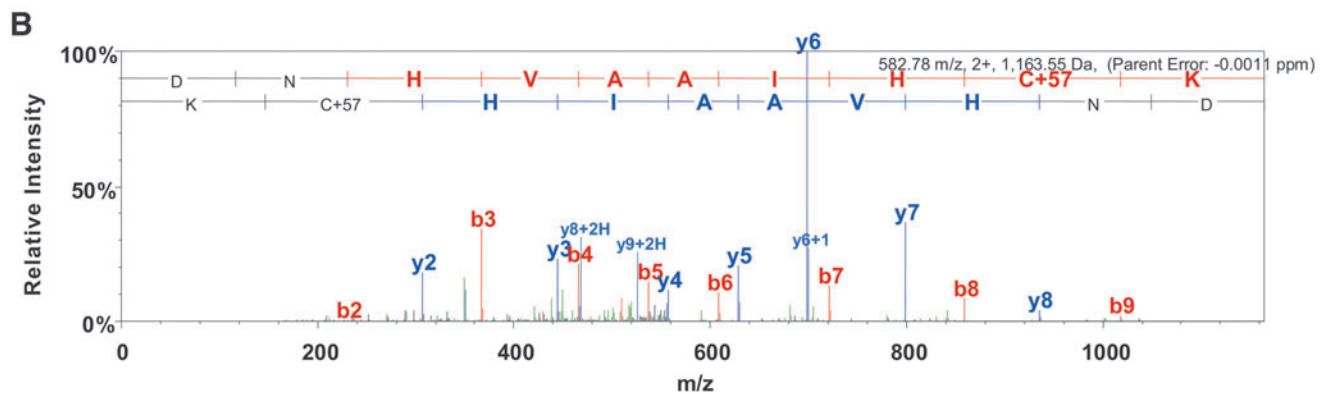

| B  | B Ions  | B+2H  | B-NH3   | B-H2O   | AA   | Y Ions  | Y+2H  | Y-NH3   | Y-H2O   | Y  |
|----|---------|-------|---------|---------|------|---------|-------|---------|---------|----|
| 1  | 116.0   |       |         | 98.0    | D    | 1,164.6 | 582.8 | 1,147.5 | 1,146.5 | 10 |
| 2  | 230.1   |       | 213.1   | 212.1   | N    | 1,049.5 | 525.3 | 1,032.5 |         | 9  |
| 3  | 367.1   | 184.1 | 350.1   | 349.1   | H    | 935.5   | 468.2 | 918.5   |         | 8  |
| 4  | 466.2   | 233.6 | 449.2   | 448.2   | V    | 798.4   | 399.7 | 781.4   |         | 7  |
| 5  | 537.2   | 269.1 | 520.2   | 519.2   | A    | 699.4   | 350.2 | 682.3   |         | 6  |
| 6  | 608.3   | 304.6 | 591.3   | 590.3   | A    | 628.3   | 314.7 | 611.3   |         | 5  |
| 7  | 721.4   | 361.2 | 704.3   | 703.4   | I    | 557.3   | 279.1 | 540.3   |         | 4  |
| 8  | 858.4   | 429.7 | 841.4   | 840.4   | H    | 444.2   | 222.6 | 427.2   |         | 3  |
| 9  | 1,018.5 | 509.7 | 1,001.4 | 1,000.4 | C+57 | 307.1   |       | 290.1   |         | 2  |
| 10 | 1,164.6 | 582.8 | 1,147.5 | 1,146.5 | K    | 147.1   |       | 130.1   |         | 1  |

**SUPPLEMENTARY FIG. S9. Mass spectrometric analysis of differentially alkylated PTEN-WT or -C71S reveals NaHS-induced oxidation of Cys-124.** PTEN-WT or -C71S was treated with NaHS or H<sub>2</sub>O<sub>2</sub> and reduced thiols blocked with NEM. Oxidized thiols (disulfides and persulfides) were reduced with DTT, following alkylation with IAM as described in Materials and Methods. Differentially alkylated PTEN was digested with AspN and trypsin. The resulting peptides were subjected to LTQ Orbitrap Velos mass spectrometry as described in Materials and Methods, and analyzed using the Scaffold software. **(A)** Xcorr, deltaCn scores, and both actual and observed masses of the Cys124-IAM-alkylated peptide DNHVAAIHCK. **(B)** CID MS/MS spectra and fragment ion table of a representative Cys124-IAM peptide with the b- and y-fragment ion series labeled in red and blue, respectively. **(C)** The Cys124-IAM peptides were also semiquantitatively assessed by MALDI-TOF MS/MS, and their mass peaks are shown for the specified samples. IAM, iodoacetamide.

C

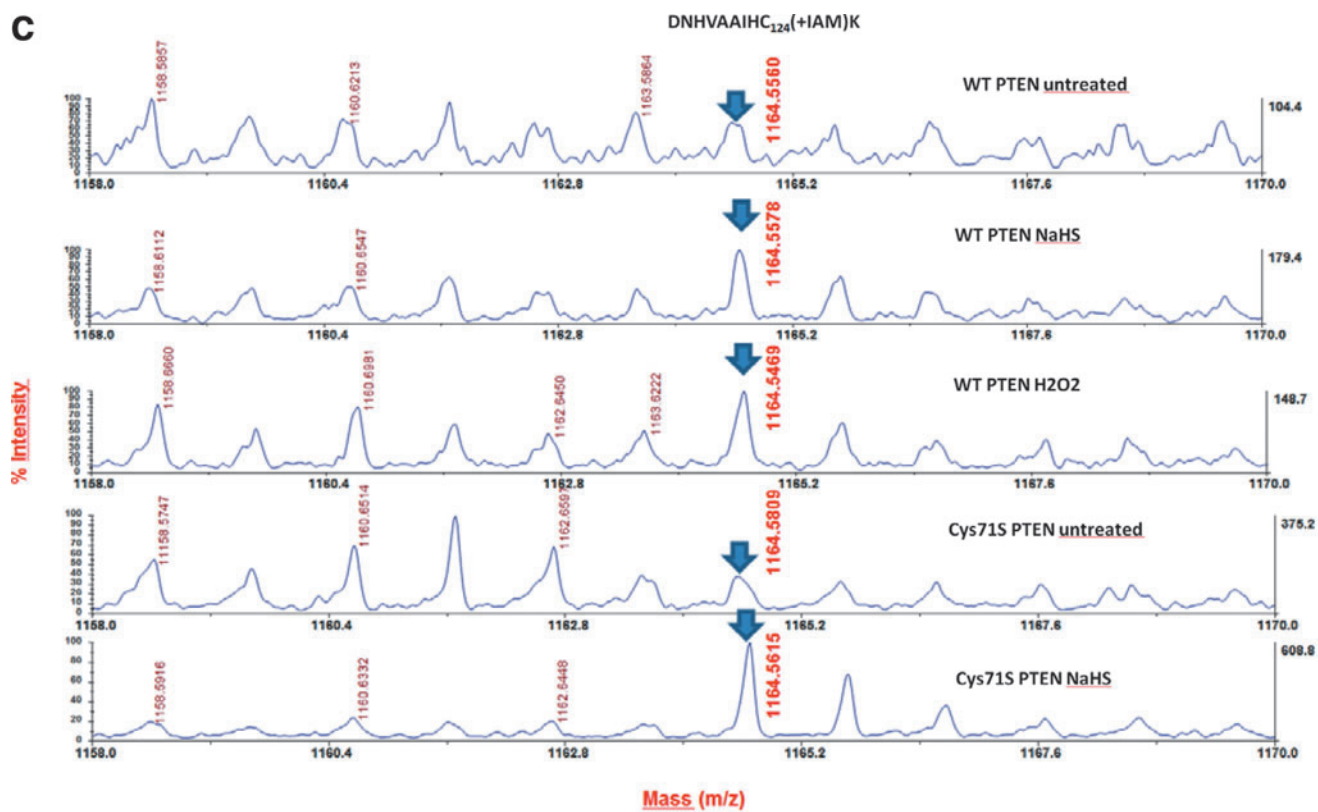

SUPPLEMENTARY FIG. S9. (Continued).
