# Supplementary material
Source: PubMed Central journal article supplement (PMC3837443)
Supplement: Supp_Fig10.pdf [file Supp_Fig10.pdf]

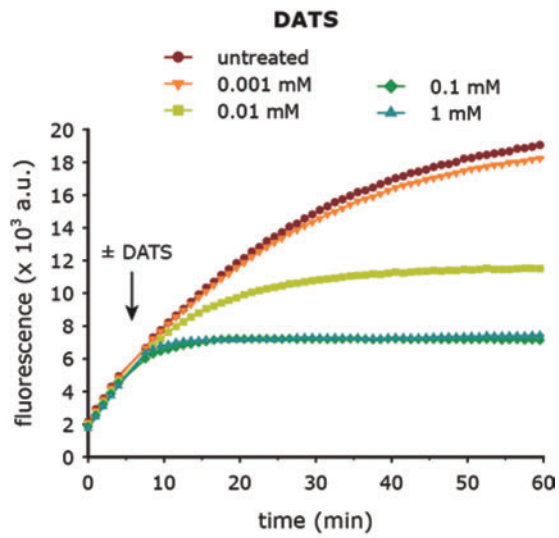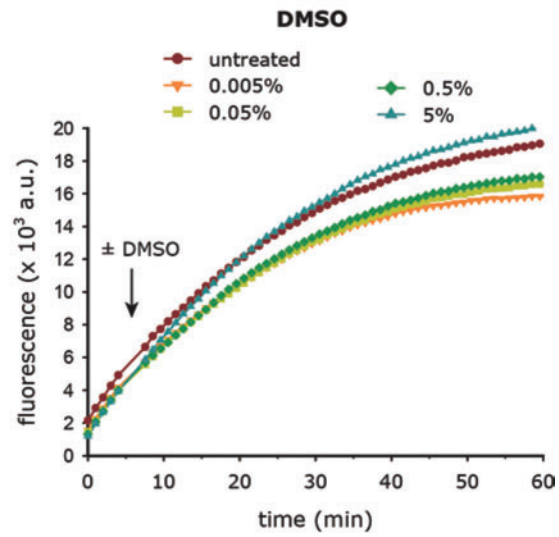

**SUPPLEMENTARY FIG. S10. DATS efficiently inhibits PTEN *in vitro*.** The PTEN-WT activity was measured under nonreducing conditions upon injection of buffer (untreated), 0.001–1 mM DATS, or vehicle control (DMSO) (injection indicated by *arrow*). Curves represent means of triplicate wells. DATS, diallyl trisulfide.
