# Supplementary material
Source: PubMed Central journal article supplement (PMC3837443)
Supplement: Supp_Fig11.pdf [file Supp_Fig11.pdf]

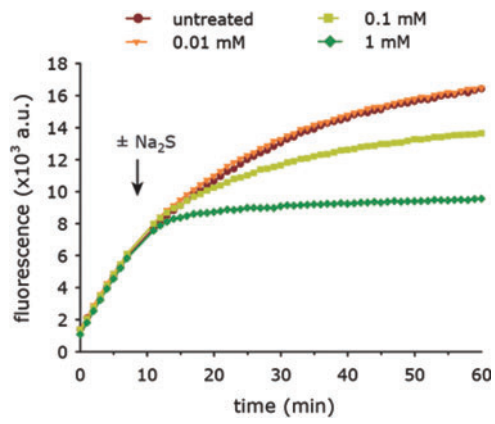

**SUPPLEMENTARY FIG. S11. Na<sub>2</sub>S from Sigma leads to PTEN oxidation despite its superior purity.** The PTEN activity was measured upon injection of buffer (untreated) or 0.01–1 mM Na<sub>2</sub>S (from Sigma), which was found to show the highest purity of all NaHS/Na<sub>2</sub>S compounds tested. Curves represent means of triplicate wells.
