# Supplementary material
Source: PubMed Central journal article supplement (PMC3837443)

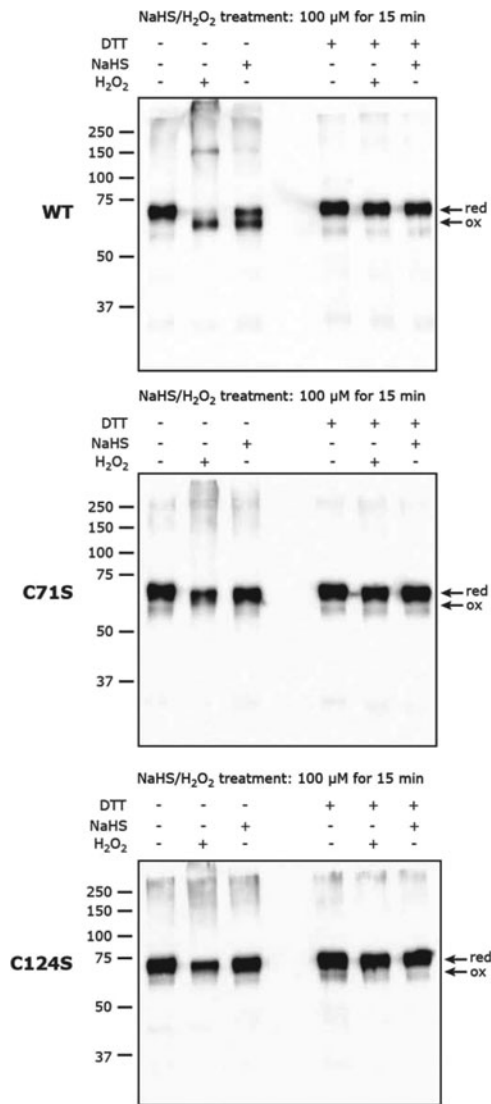

SUPPLEMENTARY FIG. S6. Noncropped immunoblot images corresponding to Figure 5A.

Supplement: Supp_Fig6.pdf [file Supp_Fig6.pdf]
